# Supplementary material for: Water channel changes in astrocytes associated with buprenorphine administration in a rat model of diffuse traumatic brain injury
Source: Research Square preprint supplement (doi:10.21203/rs.3.rs-9152535/v1), 2026-03-30

**Significance codes:**

*p* < 0.001 = *******0.001 ≤ *p* < 0.01 = ******0.01 ≤ *p* < 0.05 = *****0.05 ≤ *p* < 0.1 = **.***p* ≥ 0.1 = **ns**

Following analysis of variance testing, appropriate post hoc analyses were performed using Welch’s two-sample *t-*tests to compare groups within each region (cortex, hippocampus, thalamus), injury (sham, traumatic brain injury), and treatment (saline, buprenorphine) condition while accounting for differences in group variance.

**Abbreviations used:**

GFAP – glial fibrillary acidic protein; SWELL1 (LRRC8A) – swelling-activated chloride channel protein 1; (leucine-rich repeat–containing 8A ); TRPM4 – transient receptor potential melastatin 4; AQP4 – aquaporin 4; TBI – traumatic brain injury; ctx – cortex; hippo – hippocampus; thal – thalamus

**GFAP**

**Supplemental Table S1.** Post hoc regional comparisons for GFAP expression 1 day post injury

| **Comparison** | **t(df)** | **p-value** | **Significance** | **95% CI** | **Interpretation** |
| --- | --- | --- | --- | --- | --- |
| TBI saline **ctx** *vs.* TBI saline **hippo** | -4.09(6.12) | 0.006 | ** | [-5.48, -1.39] | hippo > ctx |
| TBI saline **ctx** *vs.* TBI saline **thal** | -3.05(4.17) | 0.036 | * | [-10.85, -0.59] | thal > ctx |
| TBI saline **hippo** *vs.* TBI saline **thal** | -1.13(5.45) | 0.306 | ns | [-7.35, 2.79] | hippo = thal |
| TBI bup **ctx** *vs.* TBI bup **hippo** | -4.64(5.10) | 0.005 | ** | [-5.78, -1.67] | hippo > ctx |
| TBI bup **ctx** *vs.* TBI bup **thal** | -2.78(4.14) | 0.048 | * | [-12.05, -0.09] | thal > ctx |
| TBI bup **hippo** *vs.* TBI bup **thal** | -1.02(4.95) | 0.353 | ns | [-8.25, 3.56] | hippo = thal |

**Supplemental Table S2.** Post hoc injury comparisons for GFAP expression 4 weeks post injury

| **Comparison** | **t(df)** | **p-value** | **Significance** | **95% CI** | **Interpretation** |
| --- | --- | --- | --- | --- | --- |
| **TBI** saline (overall) *vs.* **sham** saline (overall) | 2.91(32.62) | 0.006 | ** | [0.18, 1.00] | TBI > sham |
| **TBI** saline ctx *vs.* **sham** saline ctx | 1.94(10.70) | 0.079 | . | [-0.04, 0.59] | TBI > sham *(trend)* |
| **TBI** saline hippo *vs.* **sham** saline hippo | 1.81(10.16) | 0.100 | . | [-0.15, 1.47] | TBI > sham *(trend)* |
| **TBI** saline thal *vs.* **sham** saline thal | 2.16(5.89) | 0.074 | . | [-0.12, 1.84] | TBI > sham *(trend)* |
| **TBI** bup (overall) *vs.* **sham** bup (overall) | -0.15(31.04) | 0.884 | ns | [-0.39, 0.34] | TBI = sham |
| **TBI** bup ctx *vs.* **sham** bup ctx | -0.71(7.00) | 0.501 | ns | [-0.32, 0.17] | TBI = sham |
| **TBI** bup hippo *vs.* **sham** bup hippo | -1.82(6.58) | 0.115 | ns | [-1.11, 0.15] | TBI = sham |
| **TBI** bup thal *vs.* **sham** bup thal | 1.43(8.37) | 0.190 | ns | [-0.30, 1.29] | TBI = sham |

**Supplemental Table S3.** Post hoc regional comparisons for GFAP expression 4 weeks post injury

| **Comparison** | **t(df)** | **p-value** | **Significance** | **95% CI** | **Interpretation** |
| --- | --- | --- | --- | --- | --- |
| sham saline **ctx** *vs.* sham saline **hippo** | -1.83(5.93) | 0.118 | ns | [-1.26, 0.18] | ctx = hippo |
| sham saline **ctx** *vs.* sham saline **thal** | -1.59(9.32) | 0.146 | ns | [-0.55, 0.09] | ctx = thal |
| sham saline **hippo** *vs.* sham saline **thal** | 1.03(6.60) | 0.341 | ns | [-0.42, 1.04] | hippo = thal |
| TBI saline **ctx** *vs.* TBI saline **hippo** | -3.59(8.70) | 0.006 | ** | [-1.50, -0.34] | hippo > ctx |
| TBI saline **ctx** *vs.* TBI saline **thal** | -2.04(5.87) | 0.088 | . | [-1.79, 0.16] | thal > ctx *(trend)* |
| TBI saline **hippo** *vs.* TBI saline **thal** | 0.25(8.40) | 0.811 | ns | [-0.91, 1.13] | hippo = thal |
| sham bup **ctx** *vs.* sham bup **hippo** | -7.59(8.18) | <0.001 | *** | [-1.06, -0.56] | hippo > ctx |
| sham bup **ctx** *vs.* sham bup **thal** | -1.12(5.54) | 0.309 | ns | [-0.68, 0.26] | ctx = thal |
| sham bup **hippo** *vs.* sham bup **thal** | 2.89(7.74) | 0.021 | * | [0.12, 1.08] | hippo > thal |
| TBI bup **ctx** *vs.* TBI bup **hippo** | -1.53(6.43) | 0.173 | ns | [-1.04, 0.23] | hippo > ctx *(trend)* |
| TBI bup **ctx** *vs.* TBI bup **thal** | -2.52(6.01) | 0.045 | * | [-1.53, -0.02] | thal > ctx |
| TBI bup **hippo** *vs.* TBI bup **thal** | -0.98(9.69) | 0.351 | ns | [-1.23, 0.48] | hippo = thal |

**Supplemental Table S4.** Post hoc treatment comparisons for GFAP expression 4 weeks post injury

| **Comparison** | **t(df)** | **p-value** | **Significance** | **95% CI** | **Interpretation** |
| --- | --- | --- | --- | --- | --- |
| sham **saline** (overall) *vs.* sham **bup** (overall) | -1.13(35.17) | 0.264 | ns | [-0.48, 0.14] | saline = bup |
| sham **saline** ctx *vs.* sham **bup** ctx | -0.84(7.35) | 0.430 | ns | [-0.31, 0.14] | saline = bup |
| sham **saline** hippo *vs.* sham **bup** hippo | -1.18(6.21) | 0.280 | ns | [-1.07, 0.37] | saline = bup |
| sham **saline** thal *vs.* sham **bup** thal | -0.30(8.37) | 0.774 | ns | [-0.56, 0.43] | saline = bup |
| TBI **saline** (overall) *vs.* TBI **bup** (overall) | 1.99(35.77) | 0.055 | . | [-0.01, 0.89] | saline > bup *(trend)* |
| TBI **saline** ctx *vs.* TBI **bup** ctx | 1.83(10.92) | 0.095 | . | [-0.05, 0.59] | saline > bup (*trend)* |
| TBI **saline** hippo *vs.* TBI **bup** hippo | 2.34(10.74) | 0.040 | * | [0.04, 1.53] | saline > bup |
| TBI **saline** thal *vs.* TBI **bup** thal | 0.63(9.41) | 0.546 | ns | [-0.78, 1.38] | saline = bup |

**SWELL1**

**Supplemental Table S5.** Post hoc injury comparisons for SWELL1 expression 4 weeks post injury

| **Comparison** | **t(df)** | **p-value** | **Significance** | **95% CI** | **Interpretation** |
| --- | --- | --- | --- | --- | --- |
| **TBI** saline (overall) *vs.* **sham** saline (overall) | 1.76(33.26) | 0.087 | . | [-0.02, 0.30] | TBI > sham *(trend)* |
| **TBI** saline ctx *vs.* **sham** saline ctx | 2.91(9.23) | 0.017 | * | [0.06, 0.46] | TBI > sham |
| **TBI** saline hippo *vs.* **sham** saline ctx | 0.70(6.90) | 0.507 | ns | [-0.21, 0.39] | TBI = sham |
| **TBI** saline thal *vs.* **sham** saline thal | 0.41(8.09) | 0.694 | ns | [-0.14, 0.21] | TBI = sham |

**Supplemental Table S6.** Post hoc regional comparisons for SWELL1 expression 4w post injury

| **Comparison** | **t(df)** | **p-value** | **Significance** | **95% CI** | **Interpretation** |
| --- | --- | --- | --- | --- | --- |
| sham saline **ctx** *vs.* sham saline **hippo** | -2.14(8.39) | 0.063 | . | [-0.61, 0.02] | hippo > ctx *(trend)* |
| sham saline **ctx** *vs.* sham saline **thal** | 0.86(9.88) | 0.411 | ns | [-0.14, 0.30] | ctx = thal |
| sham saline **hippo** *vs.* sham saline **thal** | 2.83(7.84) | 0.023 | * | [0.07, 0.69] | hippo > thal |
| TBI saline **ctx** *vs.* TBI saline **hippo** | -1.73(12.00) | 0.109 | ns | [-0.28, 0.03] | ctx = hippo |
| TBI saline **ctx** *vs.* TBI saline **thal** | 4.90(10.63) | 0.001 | ** | [0.17, 0.46] | ctx > thal |
| TBI saline **hippo** *vs.* TBI saline **thal** | 6.83(10.60) | <0.001 | *** | [0.30, 0.58] | hippo > thal |
| sham bup **ctx** *vs.* sham bup **hippo** | -2.04(11.00) | 0.066 | . | [-0.55, 0.02] | hippo > ctx *(trend)* |
| sham bup **ctx** *vs.* sham bup **thal** | 0.38(9.28) | 0.715 | ns | [-0.34, 0.48] | ctx = thal |
| sham bup **hippo** *vs.* sham bup **thal** | 1.99(7.57) | 0.083 | . | [-0.06, 0.72] | hippo > thal *(trend)* |
| TBI bup **ctx** *vs.* TBI bup **hippo** | -0.82(5.73) | 0.443 | ns | [-0.32, 0.16] | ctx = hippo |
| TBI bup **ctx** *vs.* TBI bup **thal** | -1.58(5.58) | 0.170 | ns | [-0.44, 0.10] | ctx = thal |
| TBI bup **hippo** *vs.* TBI bup **thal** | -0.66(9.87) | 0.533 | ns | [-0.41, 0.22] | hippo = thal |

**Supplemental Table S7.** Post hoc treatment comparisons for SWELL1 expression 4w post injury

| **Comparison** | **t(df)** | **p-value** | **Significance** | **95% CI** | **Interpretation** |
| --- | --- | --- | --- | --- | --- |
| sham **saline** (overall) *vs.* sham **bup** (overall) | -1.47(35.95) | 0.150 | ns | [-0.32, 0.05] | saline = bup |
| sham **saline** ctx *vs.* sham **bup** ctx | -1.05(10.36) | 0.315 | ns | [-0.42, 0.15] | saline = bup |
| sham **saline** hippo *vs.* sham **bup** hippo | -0.73(8.82) | 0.484 | ns | [-0.42, 0.22] | saline = bup |
| sham **saline** thal *vs.* sham **bup** thal | -0.93(6.88) | 0.383 | ns | [-0.54, 0.23] | saline = bup |
| TBI **saline** (overall) *vs.* TBI **bup** (overall) | 0.79(35.95) | 0.433 | ns | [-0.08, 0.19] | saline = bup |
| TBI **saline** ctx *vs.* TBI **bup** ctx | 3.31(8.71) | 0.010 | ** | [0.06, 0.32] | saline > bup |
| TBI **saline** hippo *vs.* TBI **bup** hippo | 2.18(7.85) | 0.062 | . | [-0.01, 0.48] | saline > bup *(trend)* |
| TBI **saline** thal *vs.* TBI **bup** thal | -2.64(6.30) | 0.037 | * | [-0.57, -0.02] | bup > saline |

**TRPM4**

**Supplemental Table S8.** Post hoc regional comparisons for TRPM4 expression 1 day post injury

| **Comparison** | **t(df)** | **p-value** | **Significance** | **95% CI** | **Interpretation** |
| --- | --- | --- | --- | --- | --- |
| TBI saline **ctx** *vs.* TBI saline **hippo** | 3.20(5.04) | 0.024 | * | [0.35, 3.12] | ctx > hippo |
| TBI saline **ctx** *vs.* TBI saline **thal** | 1.94(7.95) | 0.089 | . | [-0.28, 3.18] | ctx > thal *(trend)* |
| TBI saline **hippo** *vs.* TBI saline **thal** | -0.48(4.89) | 0.654 | ns | [-1.78, 1.23] | hippo = thal |
| TBI bup **ctx** *vs.* TBI bup **hippo** | 7.17(7.77) | <0.001 | *** | [1.51, 2.96] | ctx > hippo |
| TBI bup **ctx** *vs.* TBI bup **thal** | 3.04(5.27) | 0.027 | * | [0.32, 3.55] | ctx > thal |
| TBI bup **hippo** *vs.* TBI bup **thal** | -0.48(4.91) | 0.650 | ns | [-1.92, 1.31] | hippo = thal |

**Supplemental Table S9.** Post hoc injury comparisons for TRPM4 expression 4 weeks post injury

| **Comparison** | **t(df)** | **p-value** | **Significance** | **95% CI** | **Interpretation** |
| --- | --- | --- | --- | --- | --- |
| **TBI** saline (overall) *vs.* **sham** saline (overall) | 2.18(35.82) | 0.036 | * | [0.09, 2.52] | TBI > sham |
| **TBI** saline ctx *vs.* **sham** saline ctx | 4.01(10.31) | 0.002 | ** | [1.27, 4.41] | TBI > sham |
| **TBI** saline hippo *vs.* **sham** saline hippo | 2.19(8.33) | 0.059 | . | [-0.09, 3.88] | TBI > sham *(trend)* |
| **TBI** saline thal *vs.* **sham** saline thal | -1.23(7.38) | 0.258 | ns | [-3.36, 1.05] | TBI = sham |
| **TBI** bup (overall) *vs.* **sham** bup (overall) | 0.60(23.39) | 0.551 | ns | [-1.27, 2.33] | TBI = sham |
| **TBI** bup ctx *vs.* **sham** bup ctx | -1.44(8.93) | 0.184 | ns | [-2.48, 0.55] | TBI = sham |
| **TBI** bup hippo *vs.* **sham** bup hippo | 0.65(5.79) | 0.542 | ns | [-1.74, 2.99] | TBI = sham |
| **TBI** bup thal *vs.* **sham** bup thal | 0.90(6.87) | 0.397 | ns | [-3.32, 7.40] | TBI = sham |

**Supplemental Table S10.** Post hoc regional comparisons for TRPM4 expression 4 weeks post injury

| **Comparison** | **t(df)** | **p-value** | **Significance** | **95% CI** | **Interpretation** |
| --- | --- | --- | --- | --- | --- |
| sham saline **ctx** *vs.* sham saline **hippo** | -1.53(7.72) | 0.167 | ns | [-3.26, 0.67] | ctx = hippo |
| sham saline **ctx** *vs.* sham saline **thal** | -0.83(7.20) | 0.431 | ns | [-2.97, 1.42] | ctx = thal |
| sham saline **hippo** *vs.* sham saline **thal** | 0.46(9.86) | 0.657 | ns | [-1.99, 3.02] | hippo = thal |
| TBI saline **ctx** *vs.* TBI saline **hippo** | -0.48(11.23) | 0.643 | ns | [-1.96, 1.26] | ctx = hippo |
| TBI saline **ctx** *vs.* TBI saline **thal** | 4.47(10.50) | 0.001 | ** | [1.62, 4.81] | ctx > thal |
| TBI saline **hippo** *vs.* TBI saline **thal** | 5.80(10.98) | <0.001 | *** | [2.21, 4.92] | hippo > thal |
| sham bup **ctx** *vs.* sham bup **hippo** | -3.21(10.76) | 0.009 | ** | [-2.45, -0.45] | hippo > ctx |
| sham bup **ctx** *vs.* sham bup **thal** | 0.45(6.64) | 0.669 | ns | [-1.91, 2.79] | ctx = thal |
| sham bup **hippo** *vs.* sham bup **thal** | 2.00(5.82) | 0.094 | . | [-0.44, 4.23] | hippo > thal *(trend)* |
| TBI bup **ctx** *vs.* TBI bup **hippo** | -2.82(8.22) | 0.022 | * | [-5.51, -0.56] | hippo > ctx |
| TBI bup **ctx** *vs.* TBI bup **thal** | -1.20(5.72) | 0.278 | ns | [-7.87, 2.74] | ctx = thal |
| TBI bup **hippo** *vs.* TBI bup **thal** | 0.21(6.92) | 0.841 | ns | [-4.89, 5.84] | hippo = thal |

**Supplemental Table S11.** Post hoc treatment comparisons for TRPM4 expression 4 weeks post injury

| **Comparison** | **t(df)** | **p-value** | **Significance** | **95% CI** | **Interpretation** |
| --- | --- | --- | --- | --- | --- |
| sham **saline** (overall) *vs.* sham **bup** (overall) | 1.02(28.33) | 0.317 | ns | [-0.06, 0.18] | saline = bup |
| sham **saline** ctx *vs.* sham **bup** ctx | 0.24(10.79) | 0.818 | ns | [-0.10, 0.13] | saline = bup |
| sham **saline** hippo *vs.* sham **bup** hippo | 0.41(6.09) | 0.699 | ns | [-0.24, 0.34] | saline = bup |
| sham **saline** thal *vs.* sham **bup** thal | 1.86(9.57) | 0.095 | . | [-0.02, 0.23] | saline > bup *(trend)* |
| TBI **saline** (overall) *vs.* TBI **bup** (overall) | 2.82(29.53) | 0.009 | ** | [0.03, 0.18] | saline > bup |
| TBI **saline** ctx *vs.* TBI **bup** ctx | -0.45(8.63) | 0.664 | ns | [-0.17, 0.11] | saline = bup |
| TBI **saline** hippo *vs.* TBI **bup** hippo | 5.82(9.86) | <0.001 | *** | [0.16, 0.35] | saline > bup |
| TBI **saline** thal *vs.* TBI **bup** thal | 2.71(6.81) | 0.031 | * | [0.01, 0.17] | saline > bup |

**AQP4**

**Supplemental Table S12.** Post hoc regional comparisons for AQP4 expression 1 day post injury

| **Comparison** | **t(df)** | **p-value** | **Significance** | **95% CI** | **Interpretation** |
| --- | --- | --- | --- | --- | --- |
| TBI saline **ctx** *vs.* TBI saline **hippo** | -0.87(4.84) | 0.427 | ns | [-0.39, 0.19] | ctx = hippo |
| TBI saline **ctx** *vs.* TBI saline **thal** | 3.34(6.59) | 0.014 | * | [0.12, 0.71] | ctx > thal |
| TBI saline **hippo** *vs.* TBI saline **thal** | 7.00(6.13) | <0.001 | *** | [0.33, 0.69] | hippo > thal |
| TBI bup **ctx** *vs.* TBI bup **hippo** | -3.23(4.85) | 0.024 | * | [-0.41, -0.04] | hippo > ctx |
| TBI bup **ctx** *vs.* TBI bup **thal** | 3.61(7.03) | 0.009 | ** | [0.15, 0.71] | ctx > thal |
| TBI bup **hippo** *vs.* TBI bup **thal** | 6.51(4.39) | 0.002 | ** | [0.38, 0.92] | hippo > thal |

**Supplemental Table S13.** Post hoc injury comparisons for AQP4 expression 4 weeks post injury

| **Comparison** | **t(df)** | **p-value** | **Significance** | **95% CI** | **Interpretation** |
| --- | --- | --- | --- | --- | --- |
| **TBI** saline (overall) *vs.* **sham** saline (overall) | 0.59(23.10) | 0.561 | ns | [-0.08, 0.15] | TBI = sham |
| **TBI** saline ctx *vs.* **sham** saline ctx | 2.64(10.40) | 0.024 | * | [0.02, 0.24] | TBI > sham |
| **TBI** saline hippo *vs.* **sham** saline hippo | 0.16(6.04) | 0.878 | ns | [-0.27, 0.31] | TBI = sham |
| **TBI** saline thal *vs.* **sham** saline thal | -1.13(7.17) | 0.296 | ns | [-0.14, 0.05] | TBI = sham |
| **TBI** bup (overall) *vs.* **sham** bup (overall) | -0.31(34.67) | 0.755 | ns | [-0.10, 0.07] | TBI = sham |
| **TBI** bup ctx *vs.* **sham** bup ctx | 2.73(9.24) | 0.023 | * | [0.03, 0.31] | TBI > sham |
| **TBI** bup hippo *vs.* **sham** bup hippo | -4.19(9.75) | 0.002 | ** | [-0.28, -0.09] | sham > TBI |
| **TBI** bup thal *vs.* **sham** bup thal | -0.52(8.13) | 0.614 | ns | [-0.15, 0.09] | TBI = sham |

**Supplemental Table S14.** Post hoc regional comparisons for AQP4 expression 4 weeks post injury

| **Comparison** | **t (df)** | **p-value** | **Significance** | **95% CI** | **Interpretation** |
| --- | --- | --- | --- | --- | --- |
| sham saline **ctx** *vs.* sham saline **hippo** | -1.74(6.09) | 0.131 | ns | [-0.50, 0.08] | ctx = hippo |
| sham saline **ctx** *vs.* sham saline **thal** | -6.07(9.97) | <0.001 | *** | [-0.43, -0.20] | thal > ctx |
| sham saline **hippo** *vs.* sham saline **thal** | -0.90(5.98) | 0.405 | ns | [-0.40, 0.19] | hippo = thal |
| TBI saline **ctx** *vs.* TBI saline **hippo** | -1.96(11.83) | 0.073 | . | [-0.20, 0.01] | hippo > ctx *(trend)* |
| TBI saline **ctx** *vs.* TBI saline **thal** | -3.80(8.95) | 0.004 | ** | [-0.22, -0.06] | thal > ctx |
| TBI saline **hippo** *vs.* TBI saline **thal** | -1.06(8.41) | 0.317 | ns | [-0.14, 0.05] | hippo = thal |
| sham bup **ctx** *vs.* sham bup **hippo** | -3.32(11.98) | 0.006 | ** | [-0.29, -0.06] | hippo > ctx |
| sham bup **ctx** *vs.* sham bup **thal** | -3.89(10.10) | 0.003 | ** | [-0.35, -0.10] | thal > ctx |
| sham bup **hippo** *vs.* sham bup **thal** | -0.86(10.31) | 0.411 | ns | [-0.18, 0.08] | hippo = thal |
| TBI bup **ctx** *vs.* TBI bup **hippo** | 3.25(6.95) | 0.014 | * | [0.05, 0.32] | ctx > hippo |
| TBI bup **ctx** *vs.* TBI bup **thal** | -0.40(7.54) | 0.699 | ns | [-0.16, 0.11] | ctx = thal |
| TBI bup **hippo** *vs.* TBI bup **thal** | -5.72(8.29) | <0.001 | *** | [-0.29, -0.12] | thal > hippo |

**Supplemental Table S15.** Post hoc treatment comparisons for AQP4 expression 4 weeks post injury

| **Comparison** | **t (df)** | **p-value** | **Significance** | **95% CI** | **Interpretation** |
| --- | --- | --- | --- | --- | --- |
| sham **saline** (overall) *vs.* sham **bup** (overall) | -1.01(34.91) | 0.321 | ns | [-1.60, 0.54] | saline = bup |
| sham **saline** ctx *vs.* sham **bup** ctx | -1.54(10.65) | 0.152 | ns | [-2.06, 0.37] | saline = bup |
| sham **saline** hippo *vs.* sham **bup** hippo | -1.27(6.22) | 0.248 | ns | [-2.92, 0.91] | saline = bup |
| sham **saline** thal *vs.* sham **bup** thal | 0.30(9.94) | 0.770 | ns | [-2.39, 3.14] | saline = bup |
| TBI **saline** (overall) *vs.* TBI **bup** (overall) | 0.27(27.03) | 0.789 | ns | [-1.63, 2.13] | saline = bup |
| TBI **saline** ctx *vs.* TBI **bup** ctx | 3.67(10.98) | 0.004 | ** | [1.18, 4.73] | saline > bup |
| TBI **saline** hippo *vs.* TBI **bup** hippo | 0.27(7.27) | 0.800 | ns | [-2.14, 2.67] | saline = bup |
| TBI **saline** thal *vs.* TBI **bup** thal | -1.34(5.42) | 0.235 | ns | [-8.12, 2.48] | saline = bup |

**Supplemental Table S16.** AQP4/GFAP overlap

| **Comparison** | **t(df)** | **p-value** | **Significance** | **95% CI** | **Interpretation** |
| --- | --- | --- | --- | --- | --- |
| **GFAP** signal overlapping with **AQP4** (saline vs. bup) | 1.76(8) | 0.117 | ns | [-0.10, 0.72] | *Trend* toward reduced AQP4 localization within GFAP-positive astrocytic processes in bup-treated animals |
| **AQP4** signal overlapping with **GFAP** (saline vs. bup) | -0.08(8) | 0.940 | ns | [-0.26, 0.25] | No difference in the fraction of AQP4 signal overlapping with GFAP between groups |

**Supplemental Table S17.** Dextran clearance two-way ANOVA results

| **Factor** | **df** | **Sum sq** | **Mean sq** | **F-value** | **p-value** | **Significance** | **Interpretation** |
| --- | --- | --- | --- | --- | --- | --- | --- |
| injury | 1 | 32 | 31.9 | 0.177 | 0.678 | ns | No effect of sham vs. TBI on clearance |
| treatment | 1 | 135 | 135.4 | 0.753 | 0.396 | ns | No effect of saline vs. bup on clearance |
| injury:treatment | 1 | 1247 | 1247.0 | 6.939 | 0.016 | * | Effect of combination of injury & treatment taken together on clearance |
| Residuals | 20 | 3594 | 179.7 | -- | -- | -- | -- |

**Supplemental Table S18.** Post-hoc dextran clearance analysis

| **Comparison (factor being assessed)** | **t(df)** | **p-value** | **Significance** | **95% CI** | **Interpretation** |
| --- | --- | --- | --- | --- | --- |
| TBI-saline *vs.* TBI-bup (treatment with TBI) | -2.93(10) | 0.015 | * | [-33.72, -4.61] | Effect of bup in TBI |
| sham-saline *vs.* sham-bup (treatment in sham) | 1.10(10) | 0.297 | ns | [-9.90, 29.23] | No effect of bup in sham |
| TBI-saline *vs.* sham-saline (injury with saline) | 1.54(10) | 0.154 | ns | [-5.37, 29.59] | No effect of injury with saline |
| TBI-bup *vs.* sham-bup (injury with bup) | -2.19(10) | 0.053 | . | [-33.73, 0.283] | *Trend* effect of injury with bup |

**Supplemental Table S19.** Post hoc BH-adjusted dextran clearance t-test with pooled SD

|  | **sham-saline** | **sham-bup** | **TBI-saline** |
| --- | --- | --- | --- |
| **sham-bup** | 0.34 | -- | -- |
| **TBI-saline** | 0.27 | 0.76 | -- |
| **TBI-bup** | 0.45 | 0.13 | 0.13 |

**Supplemental Figure 1.** Representative western blot for GFAP with corresponding total protein


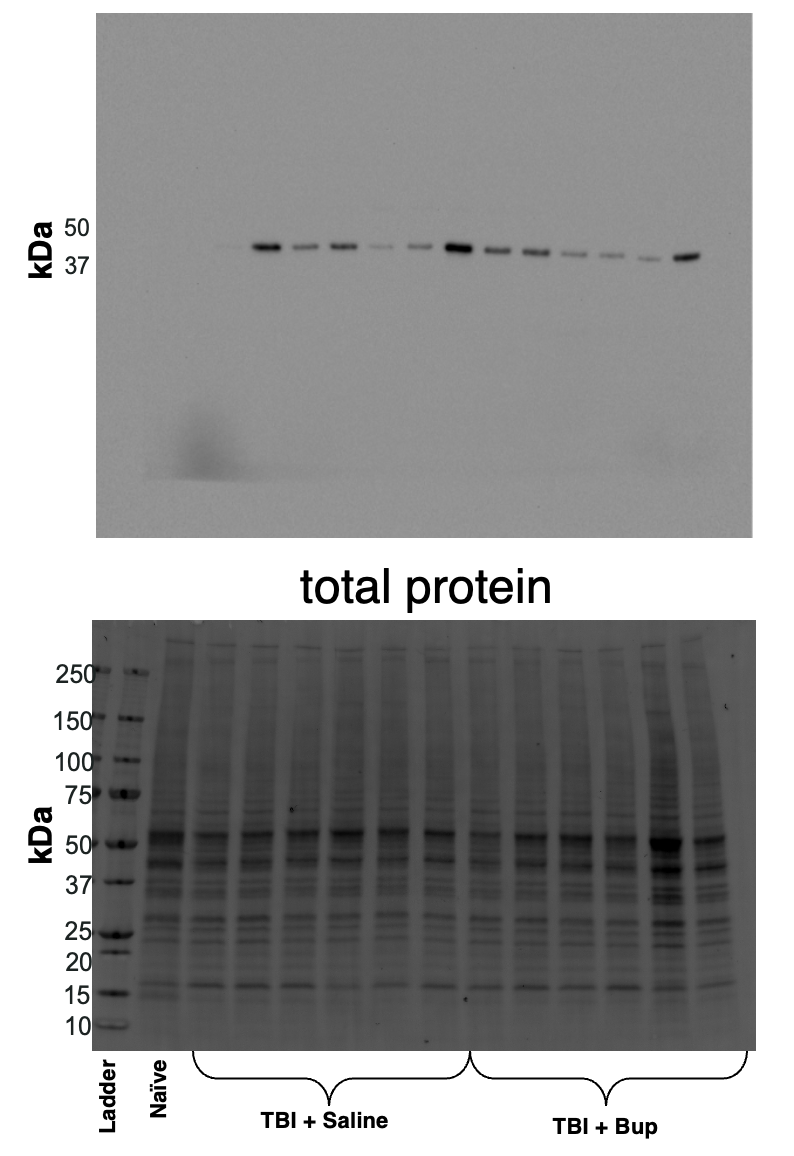


**Supplemental Figure 2.** Representative western blot for SWELL1 with corresponding total protein


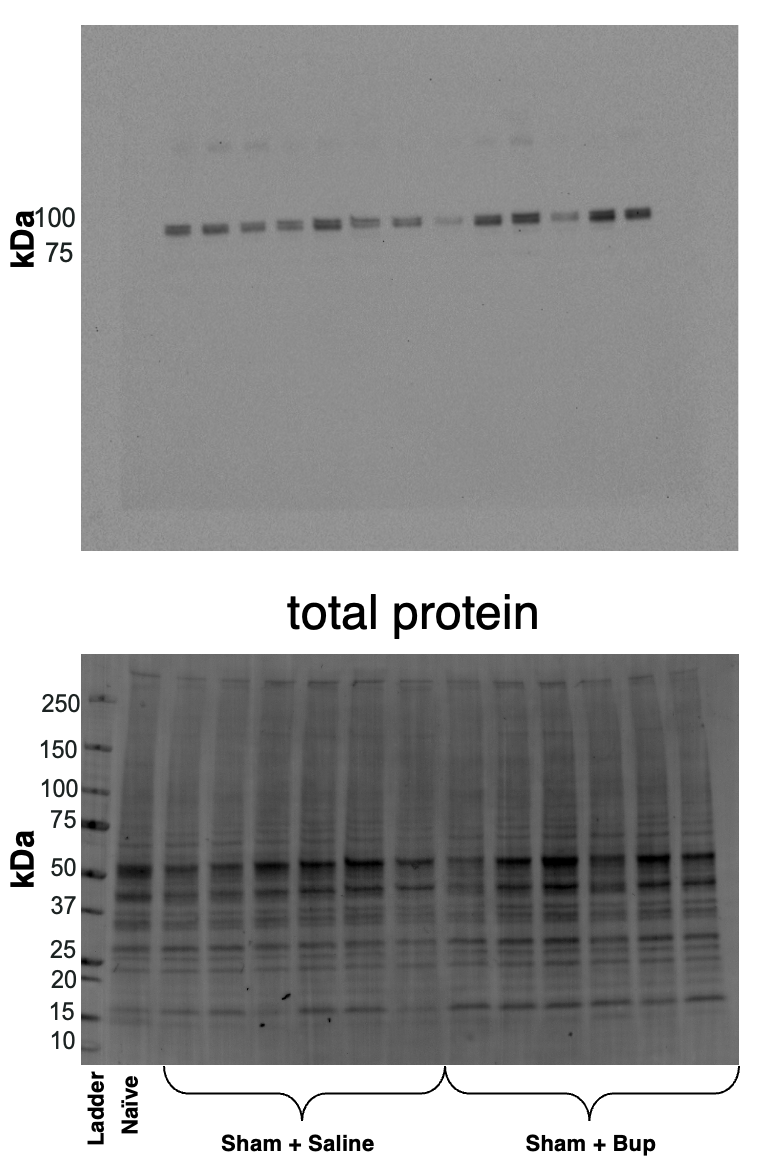


**Supplemental Figure 3.** Representative western blot for TRPM4 with corresponding total protein


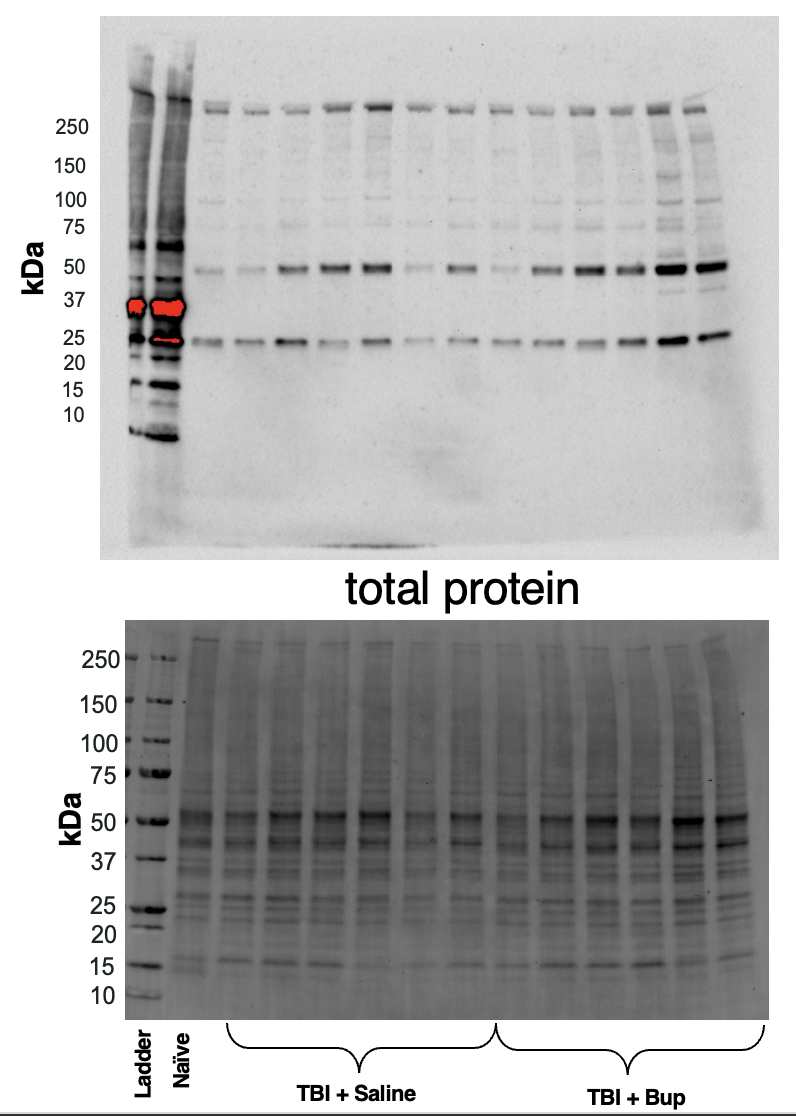


**Supplemental Figure 4.** Representative western blot for AQP4 with corresponding total protein


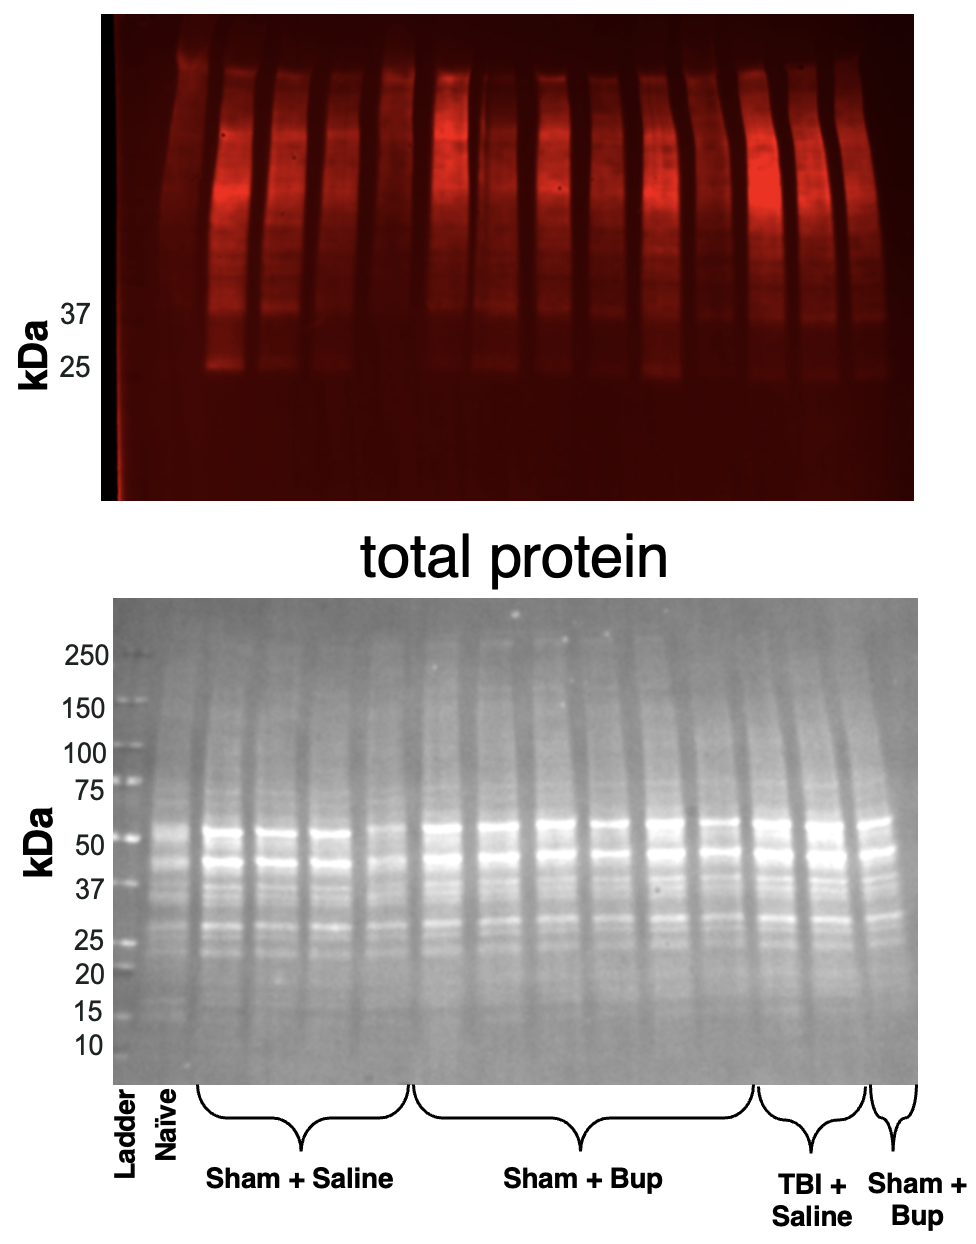

Supplement: Supplementary file 1 [file 5af7b6ff8584005f29b06b0b.docx]
