# Supplementary material for: Water channel changes in astrocytes associated with buprenorphine administration in a rat model of diffuse traumatic brain injury
Source: Research Square preprint supplement (doi:10.21203/rs.3.rs-9152535/v1), 2026-03-30
Supplement: Supplementary file 2 [file 98317ab4149005285f196667.xlsx]

## Sheet: GFAP_AQP4_Coloc
case	injury	treatment	group	GFAP_coloc_w_AQP	AQP_coloc_w_GFAP
31120	TBI	saline	TBI_saline	0.0815541	0.451756
11419B	TBI	saline	TBI_saline	0.068009	0.0200546
91520B	TBI	saline	TBI_saline	1	0.00944956
121520	TBI	saline	TBI_saline	0.452291	0.129856
121620B	TBI	saline	TBI_saline	0.548522	0.00322009
11819	TBI	bup	TBI_bup	0.170133	0.385216
101420A	TBI	bup	TBI_bup	0.0226129	0.165866
121620A	TBI	bup	TBI_bup	0.253045	0.0820853
121420A	TBI	bup	TBI_bup	0.0587887	0.00926234
31220	TBI	bup	TBI_bup	0.0921842	0.0146781

## Sheet: Dextran Clearence
Animal ID	Injury	Treatment	Dxt area ratio Thalamus (%)
11419A	Sham	saline	21.3333
103119	Sham	Saline	32.3333
113020	Sham	Saline	13.3333
120720	Sham	Saline	20.6667
91520A	Sham	saline	59
21020	Sham	Saline	23.6667
31620	Sham	Bup	16.3333
103019	Sham	Bup	28.3333
11719	Sham	Bup	41.6667
120820	Sham	Bup	3.33333
121420B	Sham	Bup	15.3333
101420B	Sham	Bup	7.33333
11619	2.12 atm	Saline	9.33333
31120	2.09 atm?	Saline	23.3333
11419B	2.07 atm	Saline	25.3333
121520	2.12 atm	Saline	6.33333
121620B	2.07 atm	Saline	5.33333
91520B	2.00 atm	Saline	28
11119	2.05 atm	bup	57.6667
31220	2.13 atm	bup	29
11119	2.06 atm	bup	36
101420A	2.0 atm	bup	37
121420A	2.06 atm	bup	21.6667
121620A	2.0 atm	bup	31.3333

## Sheet: 1D Westerns
Animal ID	Injury	Treatment	Antibody	Region	Timepoint	Mean GFAP (A.U)	Mean SWELL1 (A.U)	Mean AQP4 (A.U)	Mean TRPM4 (A.U)
101017A	tbi	saline	GFAP	ctx	1d	1.3235	0.695506	1.72407	3.73216
2118C	tbi	saline	GFAP	ctx	1d	0.216389	0.913054	1.19516	5.37807
2518C	tbi	saline	GFAP	ctx	1d	1.17393	1.01338	1.17144	6.59888
2918	tbi	saline	GFAP	ctx	1d	0.144259	0.557903	1.26022	6.09877
5819A	tbi	saline	GFAP	ctx	1d	0.0994075	0.764513	1.17377	4.69827
2518B	tbi	bup	GFAP	ctx	1d	0.143499	1.06155	1.03125	6.00955
2718A	tbi	bup	GFAP	ctx	1d	0.141026	0.739105	1.41359	5.86053
2718B	tbi	bup	GFAP	ctx	1d	0.134559	0.657022	1.32769	6.50489
62518A	tbi	bup	GFAP	ctx	1d	1.50794	0.691274	1.15749	5.83001
62518B	tbi	bup	GFAP	ctx	1d	0.963218	0.720682	1.25538	5.0225
101017B	tbi	saline	GFAP	hippo	1d	6.50243	0.929844	1.31423	3.98765
2118C	tbi	saline	GFAP	hippo	1d	6.05409	0.723833	1.32812	3.25869
2518C	tbi	saline	GFAP	hippo	1d	1.9655	0.743507	1.4823	4.05329
2918	tbi	saline	GFAP	hippo	1d	2.12769	0.683528	1.46455	3.22544
5819A	tbi	saline	GFAP	hippo	1d	4.37778	0.756235	1.41827	3.32772
2518B	tbi	bup	GFAP	hippo	1d	2.31958	0.925442	1.37745	4.03273
2718A	tbi	bup	GFAP	hippo	1d	4.48759	0.898488	1.48132	3.75132
2718B	tbi	bup	GFAP	hippo	1d	2.91648	0.868107	1.48324	3.74865
62518A	tbi	bup	GFAP	hippo	1d	5.49695	0.827023	1.4999	2.844
62518B	tbi	bup	GFAP	hippo	1d	6.30071	0.719347	1.47171	3.66689
101017A	tbi	saline	GFAP	thalamus	1d	1.21311	0.590806	1.10654	3.0081
2118C	tbi	saline	GFAP	thalamus	1d	11.3726	1.08009	0.832073	4.73408
2518C	tbi	saline	GFAP	thalamus	1d	9.64107	0.707048	0.866379	5.51157
2918	tbi	saline	GFAP	thalamus	1d	5.34132	1.05417	0.716616	3.42075
5819A	tbi	saline	GFAP	thalamus	1d	3.99152	0.748794	0.932934	2.56574
2518B	tbi	bup	GFAP	thalamus	1d	1.50027	0.699637	0.634162	4.27169
2718A	tbi	bup	GFAP	thalamus	1d	11.4169	0.634032	1.12888	5.59132
2718B	tbi	bup	GFAP	thalamus	1d	10.7888	0.93363	0.771828	4.55283
62518A	tbi	bup	GFAP	thalamus	1d	1.60346	0.55497	0.915959	2.64751
62518B	tbi	bup	GFAP	thalamus	1d	7.93629	0.337259	0.592142	2.48697

## Sheet: 4w Westerns
Animal ID	Injury	Treatment	Antibody	Region	Timepoint	Mean GFAP (A.U)	Mean SWELL1 (A.U)	Mean AQP4 (A.U)	Mean TRPM4 (A.U)
103119	sham	saline	GFAP	ctx	4w	1.46148	0.835618	0.642154	5.16254
113020	sham	saline	GFAP	ctx	4w	1.30435	1.14632	0.856409	6.11866
11419A	sham	saline	GFAP	ctx	4w	0.979907	1.00422	0.668312	4.99718
12720	sham	saline	GFAP	ctx	4w	1.10404	0.894596	0.848364	5.23859
21020	sham	saline	GFAP	ctx	4w	0.984791	0.854881	0.712652	4.95157
91520A	sham	saline	GFAP	ctx	4w	0.932902	0.609957	0.69021	3.09985
101420B	sham	bup	GFAP	ctx	4w	1.26652	1.42002	0.635077	7.43682
101722B	sham	bup	GFAP	ctx	4w	1.41661	1.29658	0.743877	6.45951
103019	sham	bup	GFAP	ctx	4w	1.19545	0.983689	0.778978	5.65693
11719	sham	bup	GFAP	ctx	4w	1.19322	0.734051	0.864672	5.5605
121420B	sham	bup	GFAP	ctx	4w	1.17723	0.677228	0.729166	4.93661
12820	sham	bup	GFAP	ctx	4w	1.05009	0.934309	0.744846	5.91039
31620A	sham	bup	GFAP	ctx	4w	1.15867	1.13215	0.571591	4.45634
101722A	tbi	saline	GFAP	ctx	4w	1.68369	1.11889	0.88251	7.30006
11419B	tbi	saline	GFAP	ctx	4w	1.0332	1.0457	1.02393	10.3072
11619	tbi	saline	GFAP	ctx	4w	1.0382	0.944616	0.829051	6.32339
121520	tbi	saline	GFAP	ctx	4w	1.68668	1.34067	0.836453	9.48608
121620B	tbi	saline	GFAP	ctx	4w	1.53267	1.24457	0.748097	7.60749
31120	tbi	saline	GFAP	ctx	4w	1.62986	1.24738	0.918879	6.92122
91520B	tbi	saline	GFAP	ctx	4w	1.21935	1.11714	0.840951	6.43109
101420A	tbi	bup	GFAP	ctx	4w	0.888457	0.93134	1.14786	4.72647
11119	tbi	bup	GFAP	ctx	4w	1.11214	0.930622	0.868943	3.95921
11819	tbi	bup	GFAP	ctx	4w	1.0896	0.996568	0.874483	4.00198
121420A	tbi	bup	GFAP	ctx	4w	1.51991	1.06216	0.851887	7.23139
121620A	tbi	bup	GFAP	ctx	4w	1.26002	0.970335	0.838859	5.43174
31220	tbi	bup	GFAP	ctx	4w	0.94045	0.882835	0.794162	3.51063
103119	sham	saline	GFAP	hippo	4w	1.62916	1.29096	0.775224	6.70928
113020	sham	saline	GFAP	hippo	4w	2.50864	1.34645	1.46572	8.02225
11419A	sham	saline	GFAP	hippo	4w	1.15458	1.48797	0.919458	7.24235
12720	sham	saline	GFAP	hippo	4w	2.51622	1.32961	1.02447	7.46164
21020	sham	saline	GFAP	hippo	4w	1.1906	0.925334	0.797446	4.26227
91520A	sham	saline	GFAP	hippo	4w	0.996104	0.742249	0.694178	3.62736
101420B	sham	bup	GFAP	hippo	4w	1.66418	1.37968	1.06531	7.05167
101722B	sham	bup	GFAP	hippo	4w	1.83891	1.01327	0.76328	7.40636
103019	sham	bup	GFAP	hippo	4w	2.30656	1.48948	0.881509	7.5939
11719	sham	bup	GFAP	hippo	4w	2.33107	1.32098	0.842997	7.06256
121420B	sham	bup	GFAP	hippo	4w	2.11764	1.30679	0.842444	8.46646
12820	sham	bup	GFAP	hippo	4w	2.07612	1.01511	0.903282	6.60701
31620A	sham	bup	GFAP	hippo	4w	1.79214	1.50029	0.98175	6.3949
101722A	tbi	saline	GFAP	hippo	4w	2.8635	1.17457	0.954789	8.45861
11419B	tbi	saline	GFAP	hippo	4w	2.1401	1.10749	0.874407	6.14869
11619	tbi	saline	GFAP	hippo	4w	3.01951	1.2576	0.983289	8.28665
121520	tbi	saline	GFAP	hippo	4w	2.53608	1.36218	0.927845	8.42911
121620B	tbi	saline	GFAP	hippo	4w	2.18306	1.42191	0.891812	8.90213
31120	tbi	saline	GFAP	hippo	4w	2.36727	1.45217	1.16893	9.62689
91520B	tbi	saline	GFAP	hippo	4w	1.15981	1.16222	0.955849	6.96817
101420A	tbi	bup	GFAP	hippo	4w	1.02985	0.723369	0.66985	3.83745
11119	tbi	bup	GFAP	hippo	4w	1.23199	1.01067	0.795815	8.51619
11819	tbi	bup	GFAP	hippo	4w	1.34039	0.954198	0.70471	7.44382
121420A	tbi	bup	GFAP	hippo	4w	1.51356	1.27124	0.766434	9.22597
121620A	tbi	bup	GFAP	hippo	4w	2.71906	1.35011	0.678483	10.4724
31220	tbi	bup	GFAP	hippo	4w	1.39079	0.946995	0.654333	7.59066
103119	sham	saline	GFAP	thalamus	4w	1.35127	0.627228	0.920499	8.09661
113020	sham	saline	GFAP	thalamus	4w	1.38663	0.890248	1.06304	3.22963
11419A	sham	saline	GFAP	thalamus	4w	0.99174	0.747008	1.14424	7.4349
12720	sham	saline	GFAP	thalamus	4w	1.19618	0.783833	1.0815	3.33249
21020	sham	saline	GFAP	thalamus	4w	1.36766	1.08207	1.13208	6.56183
91520A	sham	saline	GFAP	thalamus	4w	1.8358	0.708182	0.97843	5.58793
101722B	sham	bup	GFAP	thalamus	4w	1.77368	1.22431	0.818486	3.87906
103019	sham	bup	GFAP	thalamus	4w	0.956784	0.580172	0.897145	3.13043
11719	sham	bup	GFAP	thalamus	4w	1.32853	1.22111	1.03249	6.76844
121420B	sham	bup	GFAP	thalamus	4w	2.12394	1.10508	1.09529	6.82614
12820	sham	bup	GFAP	thalamus	4w	1.03902	0.414125	0.850278	3.11648
31620A	sham	bup	GFAP	thalamus	4w	1.2911	1.19849	0.989504	8.28546
101722A	tbi	saline	GFAP	thalamus	4w	3.35305	0.780793	0.941099	4.25303
11419B	tbi	saline	GFAP	thalamus	4w	1.02458	0.906718	1.02898	6.37997
11619	tbi	saline	GFAP	thalamus	4w	1.31307	0.786373	1.04978	3.65628
121520	tbi	saline	GFAP	thalamus	4w	3.01077	0.721456	1.03185	3.52935
121620B	tbi	saline	GFAP	thalamus	4w	2.00096	0.980011	1.02681	4.67565
31120	tbi	saline	GFAP	thalamus	4w	2.58345	0.849146	0.972626	4.82369
101420A	tbi	bup	GFAP	thalamus	4w	3.01727	1.469		10.2314
11119	tbi	bup	GFAP	thalamus	4w	1.21789	1.43162	0.892303	16.459
11819	tbi	bup	GFAP	thalamus	4w	1.38495	1.05488	0.92693	5.2037
121420A	tbi	bup	GFAP	thalamus	4w	2.21309	0.816833	1.02482	3.45784
121620A	tbi	bup	GFAP	thalamus	4w	2.32876	1.02781	0.869697	3.99953
31220	tbi	bup	GFAP	thalamus	4w	1.31868	1.00555	0.884512	4.89957
